# Supplementary material for: Constitutive Contribution by the Rice OsHKT1;4 Na+ Transporter to Xylem Sap Desalinization and Low Na+ Accumulation in Young Leaves Under Low as High External Na+ Conditions
Source: PubMed Central journal article supplement (PMC7406799; doi:10.3389/fpls.2020.01130), 2020-07-30
Supplement: DataSheet_2.pdf [file DataSheet_2.pdf]

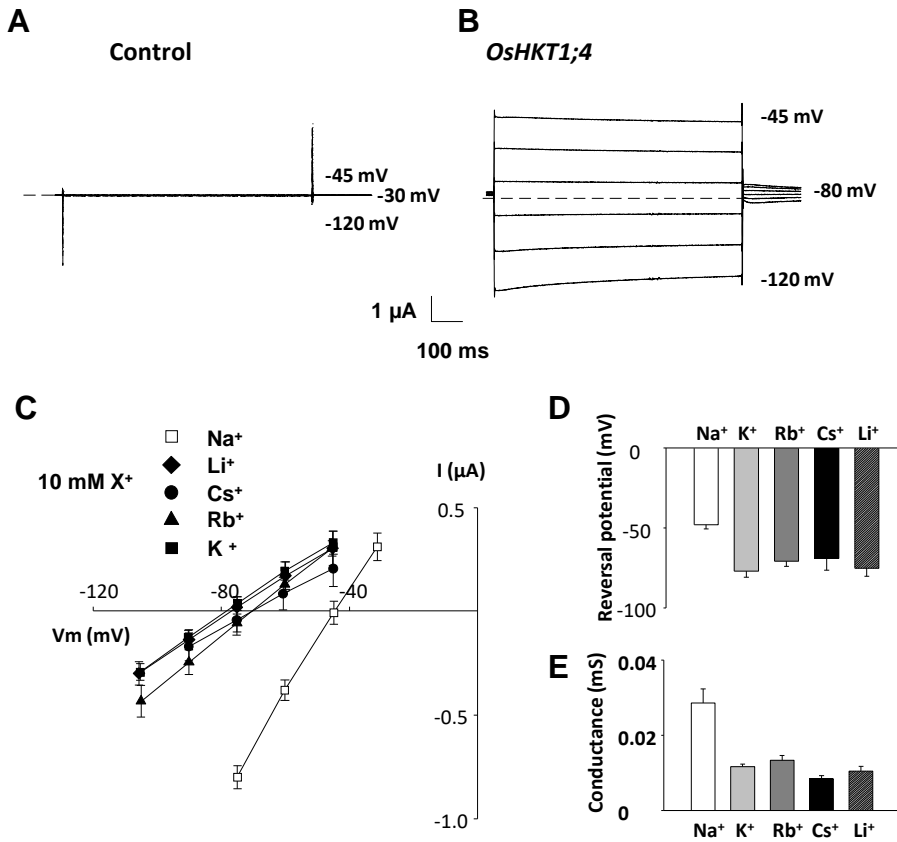

**FIGURE S2 | *OsHKT1;4* relative permeability and conductance between cations.** (A, B) Representative current traces recorded in a control oocyte injected with 50 nl of water (A), and in an oocyte injected with 50 nl of *OsHKT1;4* cRNA (B) in a bath solution containing 3 mM Na<sup>+</sup> (as glutamate salt). The applied membrane voltage was stepped from -45 to -120 mV with 15 mV increments, from a holding potential set at -30 mV (A) or -80 mV (B). (C to E) *OsHKT1;4* selectivity between monovalent cations. (C) *OsHKT1;4* current-voltage (I-V) relationships in the presence of 10 mM of different cations (Na<sup>+</sup>, K<sup>+</sup>, Rb<sup>+</sup>, Cs<sup>+</sup>, Li<sup>+</sup>), successively present (as Cl<sup>-</sup> salts) in the bath solution. (D, E) Reversal potential of *OsHKT1;4* currents (D) and *OsHKT1;4* inward conductance (E) in the presence of the different cations. Analyzed oocytes are the same as in (C). Data in (C) to (E) are means  $\pm$  SE (n = 3).
