# Supplementary material for: Constitutive Contribution by the Rice OsHKT1;4 Na+ Transporter to Xylem Sap Desalinization and Low Na+ Accumulation in Young Leaves Under Low as High External Na+ Conditions
Source: PubMed Central journal article supplement (PMC7406799; doi:10.3389/fpls.2020.01130), 2020-07-30
Supplement: DataSheet_3.pdf [file DataSheet_3.pdf]

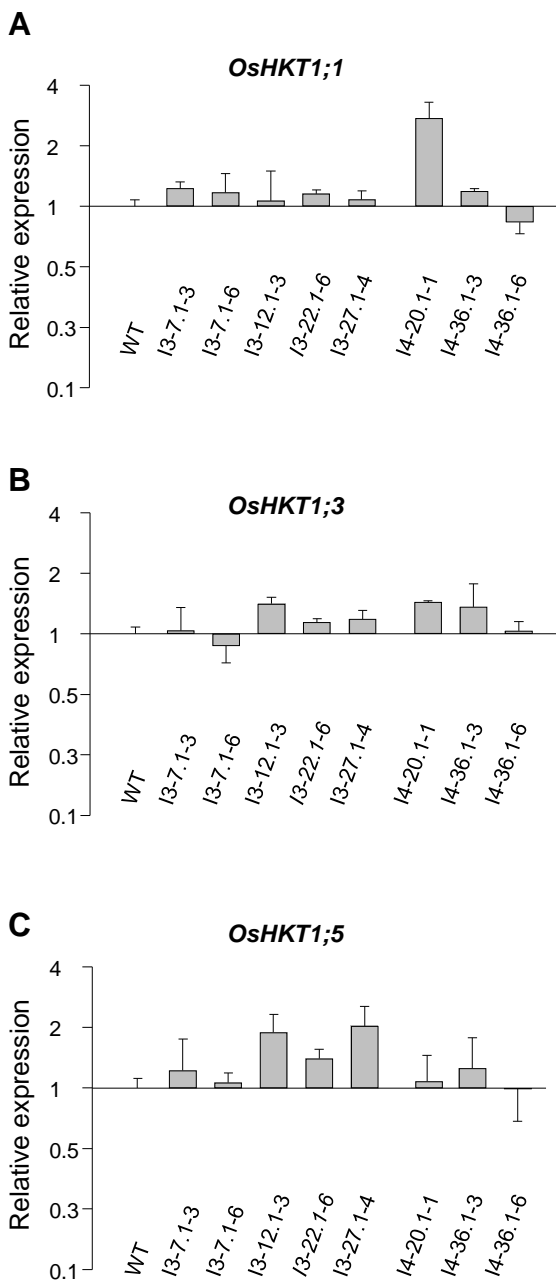

**FIGURE S3 | Expression levels of *OsHKT1;1*, *OsHKT1;3* and *OsHKT1;5* in *oshkt1;4* amiRNA rice lines I3-# and I4-# from the T2 generation as compared to the corresponding expression levels in control wild type plants. Relative expression of *OsHKT1;1* (A), *OsHKT1;3* (B) and *OsHKT1;5* (C). Plants were the same as those analyzed for *OsHKT1;4* expression in Figure 5C. Control plants (WT) were issued from the same transformation as I3-# and I4-# lines, but did not express *PI3* or *PI4* microRNA precursors. The expression level of *elongation factor 1-beta* (*EF-1-beta*) was used as a constitutive calibration control in qRT-PCR experiments. Results from five plants issued from a same T1 plant were averaged (Means  $\pm$  SE).**
