# Supplementary material for: Constitutive Contribution by the Rice OsHKT1;4 Na+ Transporter to Xylem Sap Desalinization and Low Na+ Accumulation in Young Leaves Under Low as High External Na+ Conditions
Source: PubMed Central journal article supplement (PMC7406799; doi:10.3389/fpls.2020.01130), 2020-07-30
Supplement: Table_1.pdf [file Table_1.pdf]

**Table S1. Selected amiRNA**

|                           | Selected amiRNA       | Mismatch position on amiRNA | Hybridization energy (sequence similarity) | Target position on transcript (5' -> 3' ) |
|---------------------------|-----------------------|-----------------------------|--------------------------------------------|-------------------------------------------|
| <i>OsHKT1;4</i> amiRNA I3 | TTAGTGACTAGGATAAGCGAT | 1 and 19                    | -38.97 kcal/mol (93.52%)                   | 1981-2001                                 |
| <i>OsHKT1;4</i> amiRNA I4 | TTCTAACTAAGTTCCAGGGT  | 1 and 20                    | -36.72 kcal/mol (89.10%)                   | 1485-1505                                 |
