# Supplementary material for: Constitutive Contribution by the Rice OsHKT1;4 Na+ Transporter to Xylem Sap Desalinization and Low Na+ Accumulation in Young Leaves Under Low as High External Na+ Conditions
Source: PubMed Central journal article supplement (PMC7406799; doi:10.3389/fpls.2020.01130), 2020-07-30
Supplement: Table_2.pdf [file Table_2.pdf]

**Table S2. Primers for directed mutagenesis of pNW55 vector**

| Clone                           | Primer     | Sequence                                                     | Alias       | Type    |
|---------------------------------|------------|--------------------------------------------------------------|-------------|---------|
| all                             | Universal  | GGGGacaagttgtacaaaaagcaggctCTGCAAGGCGATTAAGTTGGGTAAC         | attB1G-4368 | Forward |
|                                 | Universal  | GGGGaccactttgtacaagaaagctgggtGCGGATAACAATTCACACAGGAAAC<br>AG | attB2G-4369 | Reverse |
| <i>OsHKT1;4</i><br>amiRNA<br>13 | primer I   | agTTAGTACTAGGATAAGCGATcaggagattcagttga                       | H7-A miR1   | miR-s   |
|                                 | primer II  | tgATCGCTTATCCTAGTCACTAActgctgctgtacagcc                      | H7-A miR2   | miR-a   |
|                                 | primer III | ctATCGCATATGCTAGTCACTAActcctgctgctaggctg                     | H7-A miR3   | miR*-s  |
|                                 | primer IV  | aaTTAGTACTAGCATATGCGATagagaggcaaaagtga                       | H7-A miR4   | miR*-a  |
| <i>OsHKT1;4</i><br>amiRNA<br>14 | primer I   | agTTCTAACTAAGTTTCCAGGGTcaggagattcagttga                      | H7-B miR1   | miR-s   |
|                                 | primer II  | tgACCCTGGAACTTAGTTAGAActgctgctgtacagcc                       | H7-B miR2   | miR-a   |
|                                 | primer III | ctACCCTCGAATCTTAGTTAGAActcctgctgctaggctg                     | H7-B miR3   | miR*-s  |
|                                 | primer IV  | aaTTCTAACTAAGATTCGAGGGTagagaggcaaaagtga                      | H7-B miR4   | miR*-a  |

Lower case sequence in universal primers: *attB1* and *attB2* sites used for gateway cloning. Upper case sequence in the primers for cloning the amiRNA precursors: *amiR* and *amiR\** sequences (*amiR* targeting *OsHKT1;4*) for replacement of the miRNA and miRNA\* sequences of the naturally transcribed *osa-MIR528* already present in pNW55 vector.
