# Supplementary material for: Constitutive Contribution by the Rice OsHKT1;4 Na+ Transporter to Xylem Sap Desalinization and Low Na+ Accumulation in Young Leaves Under Low as High External Na+ Conditions
Source: PubMed Central journal article supplement (PMC7406799; doi:10.3389/fpls.2020.01130), 2020-07-30
Supplement: Table_3.pdf [file Table_3.pdf]

**Table S3. Primers used for real-time PCR expression analyses.**

| Gene            | Primer name         | Primer sequence and position / ATG             | Amplicon length (bp) |
|-----------------|---------------------|------------------------------------------------|----------------------|
| <i>OsHKT1;1</i> | HIS_HKT4-F          | <sup>1421</sup> 5'/-GGAAGTCAATTTCTTCTGATCCA-3' | 239*                 |
|                 | HIS_HKT4-R          | <sup>1660</sup> 5'/-CAAGGAGTTCATCCTGAAATGA-3'  |                      |
|                 | QRT138H4F           | <sup>1492</sup> 5'/-GGCAATGTAGGCTACTACT-3'     | 138                  |
|                 | QRT138H4R           | <sup>1631</sup> 5'/-TATCCTGGTGATGTTCTGG-3'     |                      |
| <i>OsHKT1;3</i> | H6B418F             | <sup>1324</sup> 5'/-ATCACAGAACGGGACTCGAT-3'    | 268*                 |
|                 | H6B418R             | <sup>1592</sup> 5'/-TGGAAGAGCCTGGAAGCTTA-3'    |                      |
|                 | 5???KT6a            | <sup>1340</sup> 5'/-CGATGGCTACAGATCCACTT-3'    | 127                  |
|                 | 3???KT6a            | <sup>1467</sup> 5'/-CTGAACCATGATGCACGCTG-3'    |                      |
| <i>OsHKT1;4</i> | H7B529F             | <sup>1396</sup> 5'/-TAGGGAGATGGAGCGACTCT-3'    | 424*                 |
|                 | H7B529R             | <sup>1820</sup> 5'/-GTAAAAGGCCGGATGTCATT-3'    |                      |
|                 | QRT89H7F            | <sup>1448</sup> 5'/-TGGGAGGCTCAAGAAGTTCA-3'    | 89                   |
|                 | QRT89H7R            | <sup>1537</sup> 5'/-ACCAGCTGAACATTGCAGGT-3'    |                      |
| <i>OsHKT1;5</i> | H8B388F             | <sup>1269</sup> 5'/-CCAAGACAAACACCAGCAA-3'     | 300*                 |
|                 | H8B388R             | <sup>1568</sup> 5'/-GTTGGCTTCTCAGGGAAGTG-3'    |                      |
|                 | QRT114H8F           | <sup>1363</sup> 5'/-GCCTAGCCATTTTCATCGTC-3'    | 114                  |
|                 | QRT114H8R           | <sup>1477</sup> 5'/-GGTTATCAGTGCGTATGGCA-3'    |                      |
| <i>SMT3</i>     | SMT3B303F           | <sup>14</sup> 5'/-GGGAGGAGGACAAGAAGC-3'        | 273*                 |
|                 | SMT3B303R           | <sup>286</sup> 5'/-ATGCTCCACCAGACTGGAG-3'      |                      |
|                 | QRT94SMT3-F         | <sup>66</sup> 5'/-CCTCAAGGTCAAGGGACAGG-3'      | 94                   |
|                 | QRT94SMT3-R         | <sup>160</sup> 5'/-TGAACGCCTATTGTGACCGT-3'     |                      |
| <i>TIP 41</i>   | Tip41B389F          | <sup>187</sup> 5'/-TGGTTTTTGGGGAGAGTTTC-3'     | 389*                 |
|                 | Tip41B389R          | <sup>576</sup> 5'/-TAGCCGATAATGGCATTTC-3'      |                      |
|                 | QRT101Tip41-F       | <sup>392</sup> 5'/-TGGGAGTGATGCTTTGGTTC-3'     | 101                  |
|                 | QRT101Tip41-R       | <sup>493</sup> 5'/-TGAGGATCGGATTGACCTTG-3'     |                      |
| <i>eEF-1-62</i> | eEFB2Pcs            | <sup>332</sup> 5'/-TGGTGAGGAGACTGAAGAGG-3'     | 418*                 |
|                 | eEFB2Pcas           | <sup>750</sup> 5'/-CTTCCGATTTTTCTTTTATC-3'     |                      |
|                 | QRT151eE            | <sup>476</sup> 5'/-GGAAGAAGCTGTGAGGAATG-3'     | 176                  |
|                 | QRT151eEF&# 946;2-R | <sup>652</sup> 5'/-CGAACCAGCGAATGAGTACA-3'     |                      |

\*Larger amplicons, which were used as a template for the amplification of calibration standards.
