# Supplementary material for: Constitutive Contribution by the Rice OsHKT1;4 Na+ Transporter to Xylem Sap Desalinization and Low Na+ Accumulation in Young Leaves Under Low as High External Na+ Conditions
Source: PubMed Central journal article supplement (PMC7406799; doi:10.3389/fpls.2020.01130), 2020-07-30
Supplement: Table_4.pdf [file Table_4.pdf]

**Table S4. Primers used for *OsHKT1;4 promoter::GUS* construct**

| <b>Primer name</b> | <b>Primers sequence (5'-3')</b> | <b>Amplified sequence length</b> | <b>Cloned promoter length</b> |
|--------------------|---------------------------------|----------------------------------|-------------------------------|
| G0sHKT7F1          | AGCTAGCAGCAGAGGAAAACGATG        | 2489 bp                          | 2175 bp                       |
| G0sHKT7RM2         | GCGAGCGCGCGCCGCGACGTGGCCATGGG   |                                  |                               |
